# Supplementary material
Source: Springer Nature journal article supplement (https://www.springermedizin.de/resource/supplementary/12885_2013_4689_MOESM1_ESM.pdf/9467038)
Supplement: MOESM1 [file 9467038]

## Supplemental Figure 1

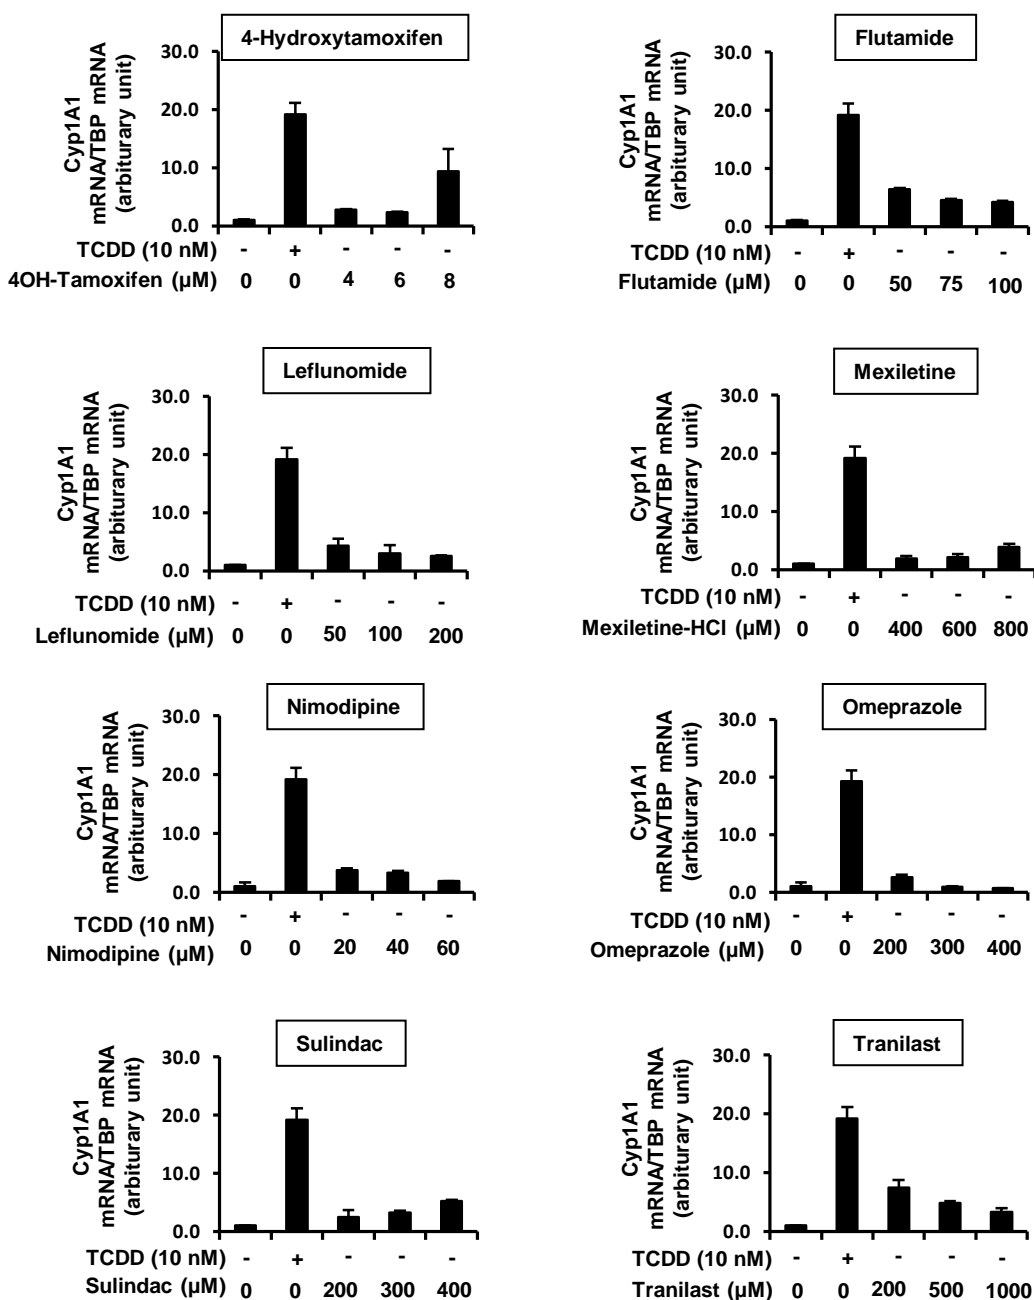

**Figure S1.** Induction of CYP1A1 mRNA by AHR-active pharmaceuticals. MDA-MB-231 cells were treated with DMSO, different concentrations of pharmaceuticals and 10 nM TCDD, and CYP1A1 mRNA levels were determined by real time PCR as outlined in the Materials and Methods. Results are expressed as means  $\pm$  SE for 3 replicate determinations.
